# Supplementary material
Source: MDPI journal article supplement (https://www.mdpi.com/2072-4292/13/3/422)
Supplement: s1 [file s1]

Article

# Modelling Accessibility to Urban Green Areas Using Open Earth Observations Data: A Novel Approach to Support the Urban SDG in Four European Cities

Gregory Giuliani <sup>1,2,\*</sup>, Ekkehard Petri <sup>3</sup>, Eduard Interwies <sup>4</sup>, Veronika Vysna <sup>3</sup>, Yaniss Guigoz <sup>1,2,5</sup>, Nicolas Ray <sup>1,5</sup> and Ian Dickie <sup>6</sup>

<sup>1</sup> Institute for Environmental Sciences, University of Geneva, Bd Carl-Vogt 66, CH-1205 Geneva, Switzerland; Yaniss.Guigoz@unige.ch (Y.G.); nicolas.ray@unige.ch (N.R.)

<sup>2</sup> United Nations Environment Programme, GRID-Geneva, 11 chemin des Anémones, CH-1211 Châtelaine, Switzerland

<sup>3</sup> European Commission—Eurostat, 5 Rue Alphonse Weicker, L-2721 Luxembourg, Luxembourg; Ekkehard.PETRI@ec.europa.eu (E.P.); Veronika.VYSNA@ec.europa.eu (V.V.)

<sup>4</sup> Intersus—Sustainability Services, Chodowieckistr. 2, 10405 Berlin, Germany; Interwies@intersus.eu

<sup>5</sup> GeoHealth Group, Institute of Global Health, University of Geneva, 9 chemin des Mines, CH-1202 Geneva, Switzerland

<sup>6</sup> Efttec—Economics for the Environment, 4 City Road, London EC1Y 2AA, UK; ian@efttec.co.uk

\* Correspondence: gregory.giuliani@unige.ch; Tel.: +41-(0)22-379-07-09

Received: 21 December 2020; Accepted: 22 January 2021; Published: 26 January 2021

## Supplementary Material

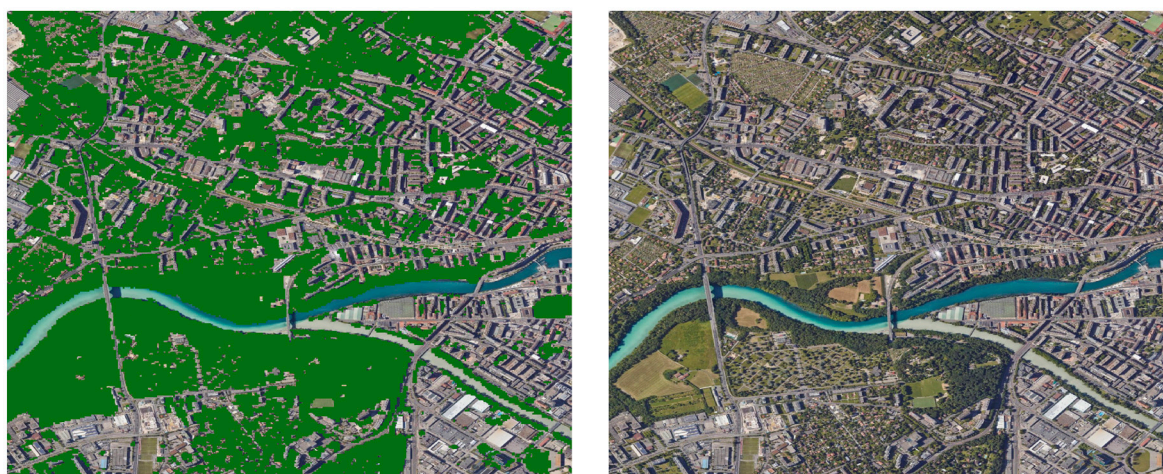

**Figure S1.** Visual comparison of extracted vegetated areas (left) and high-resolution image from Google Earth (right).

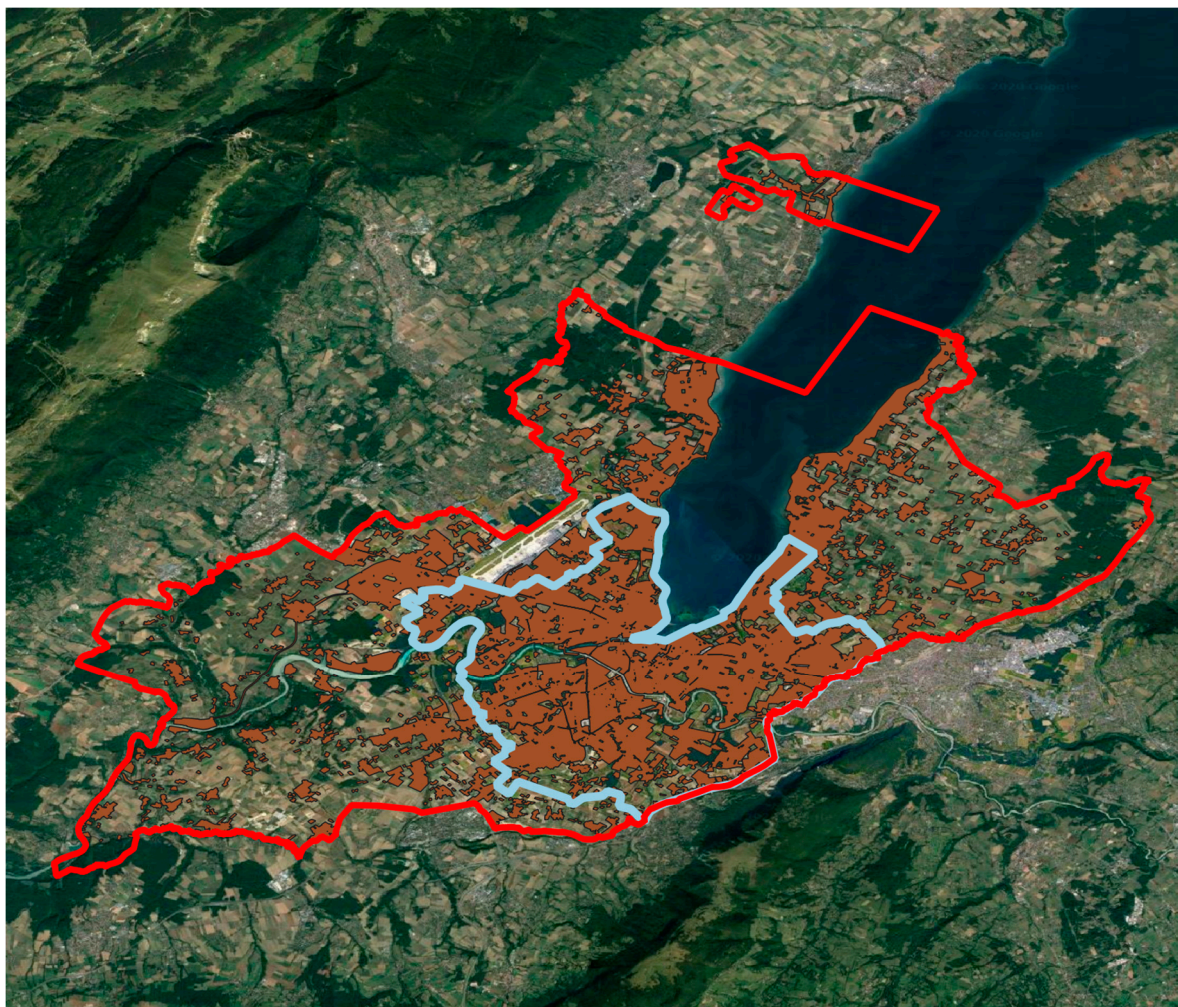

**Figure S2.** Extracted built-up areas from UA 2018 with Geneva city (blue line) and region (red line).

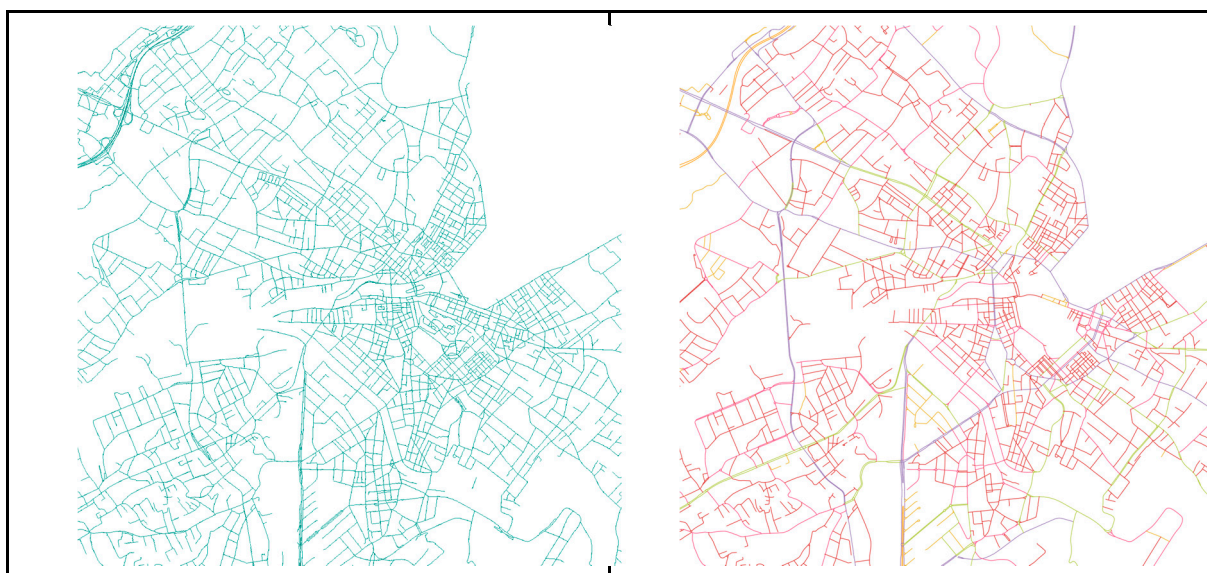

**Figure S3.** Road network in Geneva city center as mapped by the official data from SITG (left) and OSM (right).

**Table S1.** Population accessibility (%) to a park within a given maximum walking time, with two walking scenarios (slow and fast), and computed with 2020 population density estimates.

| Walking time | Geneva |       | Barcelona |       | Goteborg |       | Bristol |       |
|--------------|--------|-------|-----------|-------|----------|-------|---------|-------|
|              | Slow   | Fast  | Slow      | Fast  | Slow     | Fast  | Slow    | Fast  |
| 5 min        | 70.63  | 83.50 | 21.31     | 41.30 | 47.14    | 66.15 | 26.24   | 52.44 |
| 10 min       | 85.7   | 88.65 | 49.76     | 73.48 | 70.91    | 80.63 | 63.05   | 85.36 |
| 15 min       | 88.28  | 89.33 | 68.85     | 85.08 | 79.02    | 85.91 | 82.69   | 88.69 |

**Table S2.** Population accessibility (%) to a park within a given maximum walking time, with two walking scenarios (slow and fast), and computed with 2020 “constrained” population density estimates.

| Walking time | Geneva |       | Barcelona |       | Goteborg |       | Bristol |       |
|--------------|--------|-------|-----------|-------|----------|-------|---------|-------|
|              | Slow   | Fast  | Slow      | Fast  | Slow     | Fast  | Slow    | Fast  |
| 5 min        | 70.77  | 83.50 | 22.89     | 43.53 | 50.73    | 70.19 | 25.99   | 52.54 |
| 10 min       | 85.62  | 88.52 | 52.16     | 75.67 | 74.45    | 82.67 | 63.1    | 85.35 |
| 15 min       | 88.14  | 89.23 | 71.18     | 86.69 | 81.3     | 87.09 | 82.75   | 88.66 |

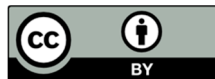

© 2021 by the authors. Licensee MDPI, Basel, Switzerland. This article is an open access article distributed under the terms and conditions of the Creative Commons Attribution (CC BY) license (<http://creativecommons.org/licenses/by/4.0/>).
